# Supplementary material
Source: Springer Nature journal article supplement (https://www.springermedizin.de/resource/supplementary/12877_2010_592_MOESM1_ESM.pdf/9439936)

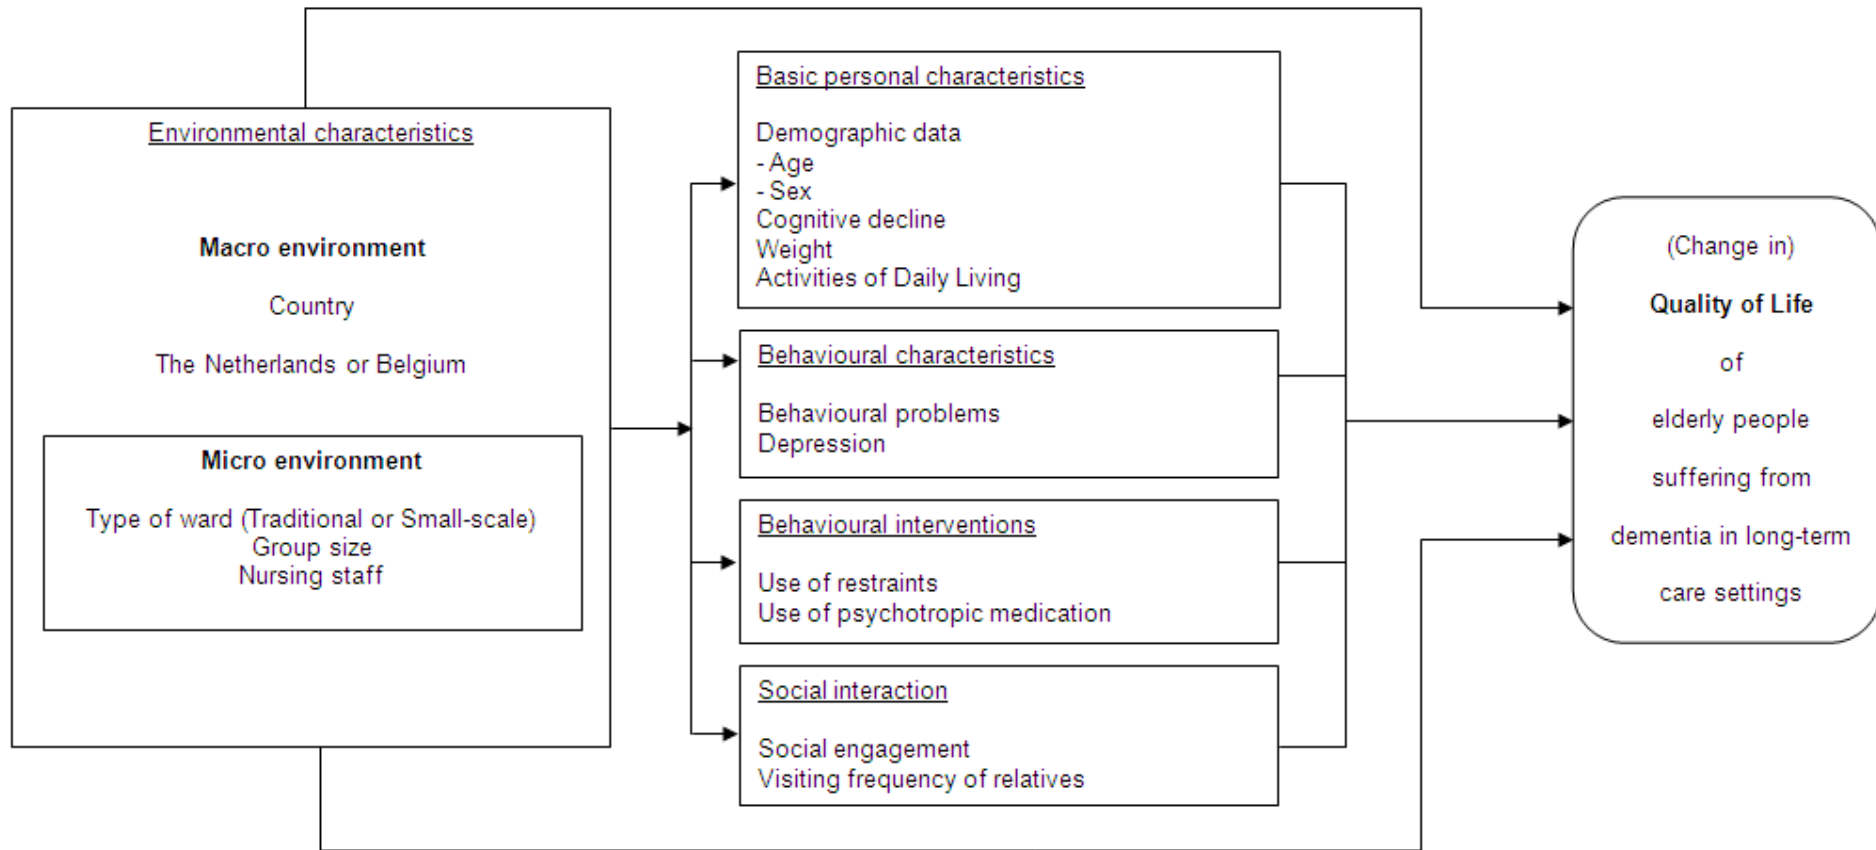

Supplement: MOESM1 [file 9439936]
